# Supplementary material
Source: PubMed Central journal article supplement (PMC10587824)
Supplement: jamaoncol-e234423-s003.pdf [file jamaoncol-e234423-s003.pdf]

## Data Sharing Statement

Manji. Chemotherapy and Immune Checkpoint Blockade for Gastric and Gastroesophageal Junction Adenocarcinoma. *JAMA Oncol.* Published October 19, 2023.

doi:10.1001/jamaoncol.2023.4423

### Data

**Data available:** Yes

**Data types:** Deidentified participant data

**How to access data:** [gam2140@cumc.columbia.edu](mailto:gam2140@cumc.columbia.edu)

**When available:** With publication

### Supporting Documents

**Document types:** None

### Additional Information

**Who can access the data:** Researchers whose proposed use of the data has been approved

**Types of analyses:** Any Purpose

**Mechanisms of data availability:** After approval of a proposal and with a signed data access agreement
